# Supplementary material for: Synthesis and dynamics of a novel proton transfer complex containing 3,5-dimethylpyrazole as a donor and 2,4-dinitro-1-naphthol as an acceptor: crystallographic, UV-visible spectrophotometric, molecular docking and Hirshfeld surface analyses
Source: Royal Society of Chemistry journal article supplement (doi:10.1039/c7nj00819h), 2017-01-01
Supplement: c7nj00819h1.pdf [file c7nj00819h1.pdf]

### Supplemental Information

**Fig. 1S.** Electronic absorption spectra of (A) DNN, acceptor ( $1 \times 10^{-4}$  M); (B) donor-acceptor CT complex ( $1 \times 10^{-4}$  M +  $1 \times 10^{-4}$  M) and (C) DMP, donor ( $1 \times 10^{-4}$  M) in methanol at room temperature.

**Fig. 2S.** Electronic absorption spectra of (A) DNN, acceptor ( $1 \times 10^{-4}$  M); (B) donor-acceptor CT complex ( $1 \times 10^{-4}$  M +  $1 \times 10^{-4}$  M) and (C) DMP, donor ( $1 \times 10^{-4}$  M) in dichloromethane at room temperature.

**Fig. 3S.** Electronic absorption spectra of (A) DNN, acceptor ( $1 \times 10^{-4}$  M); (B) donor-acceptor CT complex ( $1 \times 10^{-4}$  M +  $1 \times 10^{-4}$  M) and (C) DMP, donor ( $1 \times 10^{-4}$  M) in chloroform at room temperature.

**Fig. 4S.** TGA-DTA curve for 2,4-dinitro-1-naphthol.

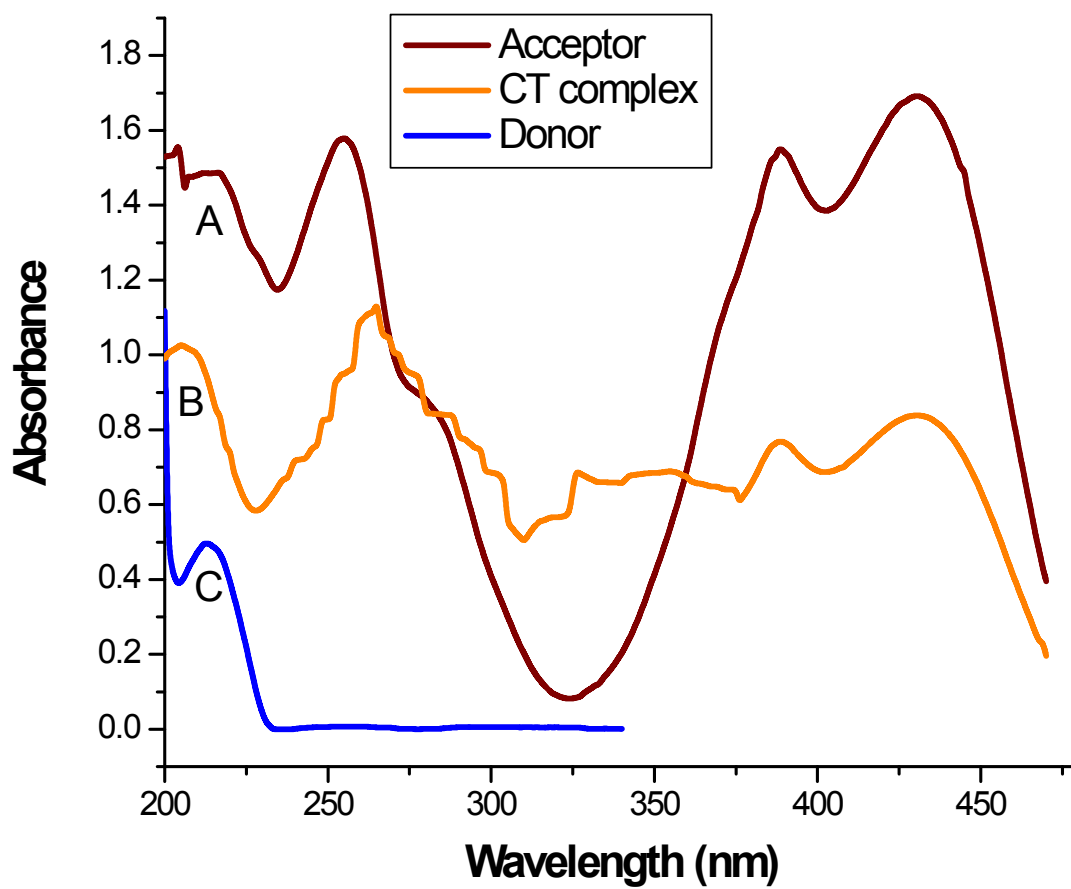

**Fig. 1S.** Electronic absorption spectra of (A) DNN, acceptor ( $1 \times 10^{-4}$  M); (B) donor-acceptor CT complex ( $1 \times 10^{-4}$  M +  $1 \times 10^{-4}$  M) and (C) DMP, donor ( $1 \times 10^{-4}$  M) in methanol at room temperature.

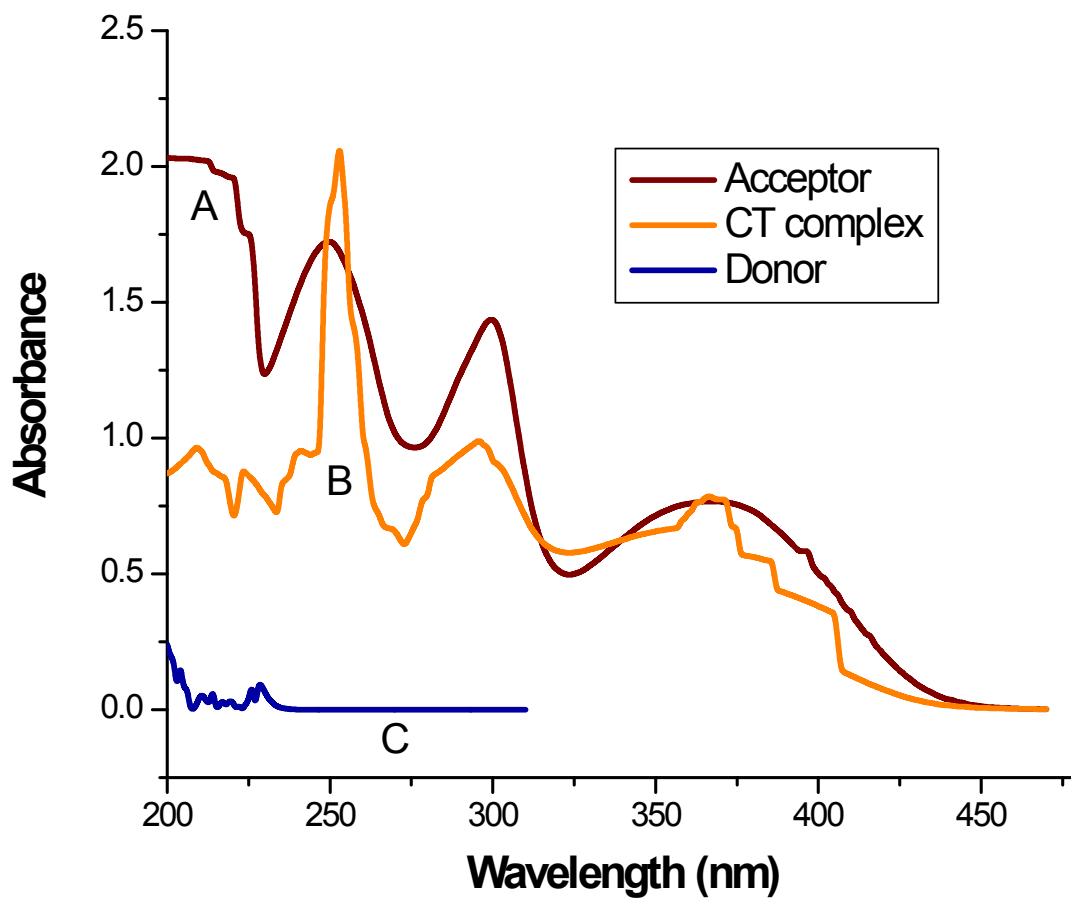

**Fig. 2S.** Electronic absorption spectra of (A) DNN, acceptor ( $1 \times 10^{-4}$  M); (B) donor-acceptor CT complex ( $1 \times 10^{-4}$  M +  $1 \times 10^{-4}$  M) and (C) DMP, donor ( $1 \times 10^{-4}$  M) in dichloromethane at room temperature.

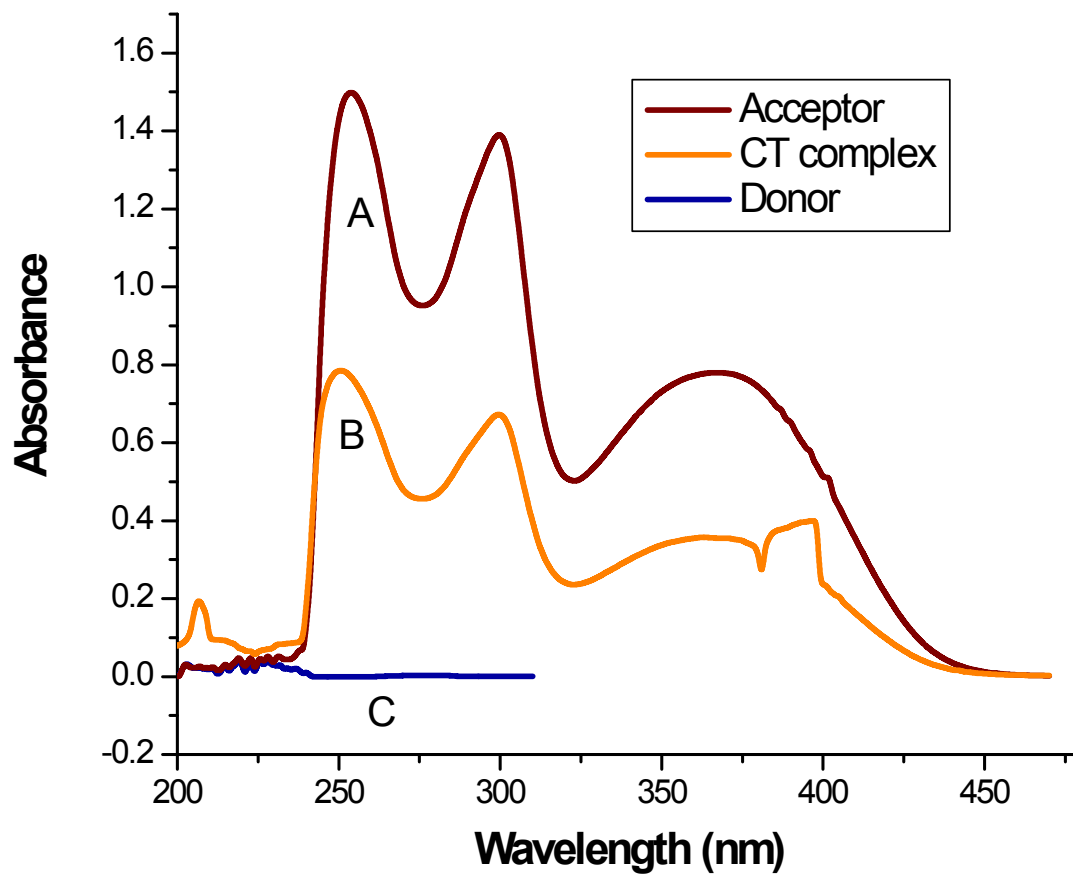

**Fig. 3S.** Electronic absorption spectra of (A) DNN, acceptor ( $1 \times 10^{-4}$  M); (B) donor-acceptor CT complex ( $1 \times 10^{-4}$  M +  $1 \times 10^{-4}$  M) and (C) DMP, donor ( $1 \times 10^{-4}$  M) in chloroform at room temperature.

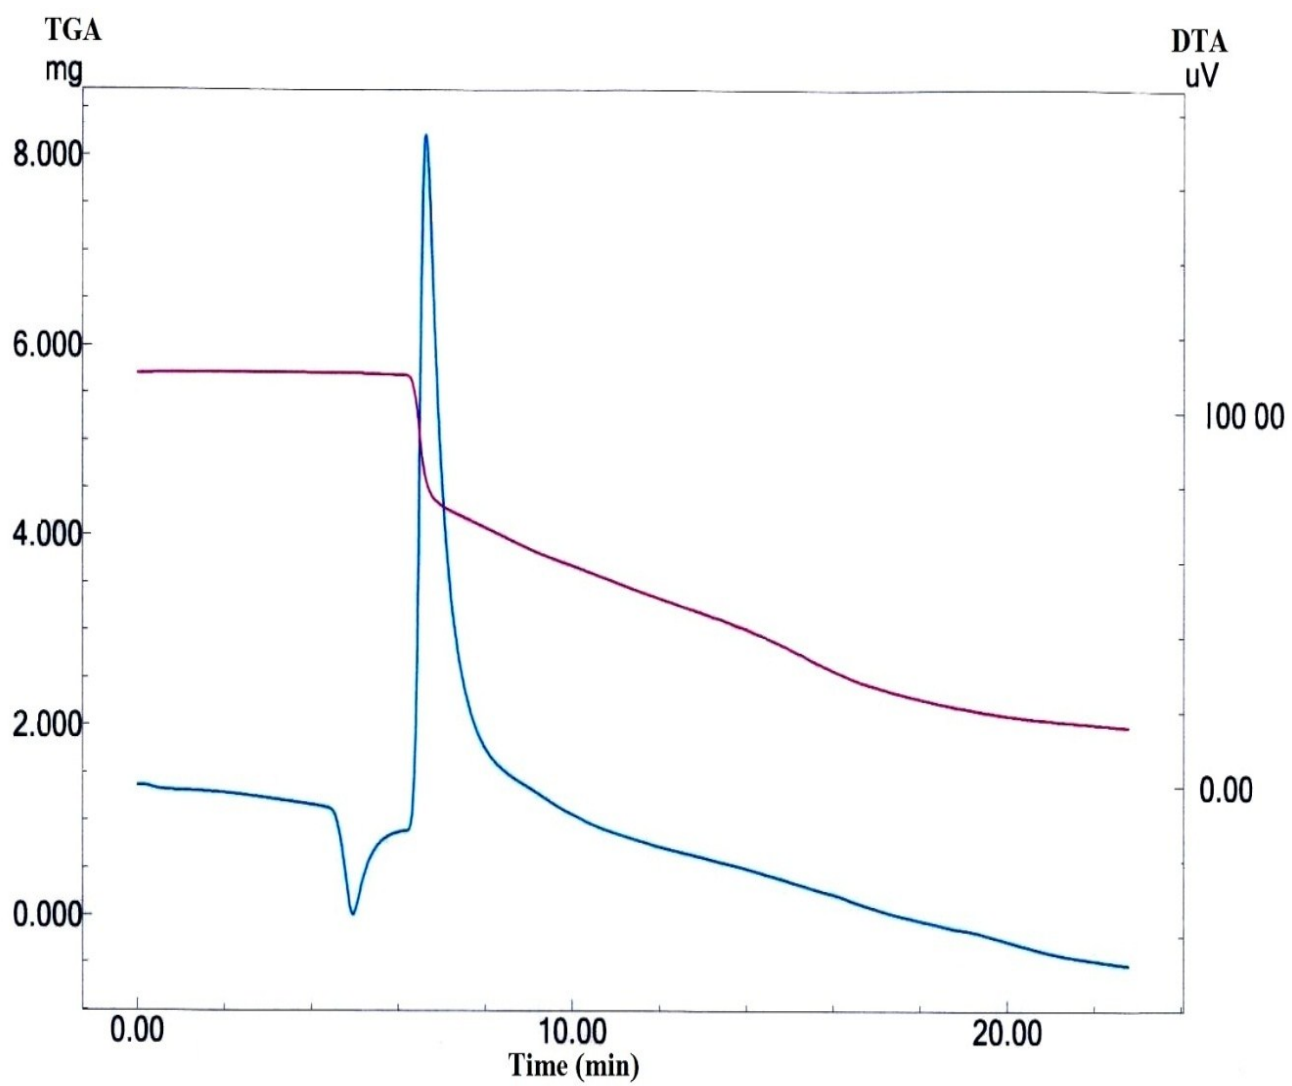

Fig. 4S. TGA-DTA curve for 2,4-dinitro-1-naphthol.

**Table 1S**

Infrared Frequencies for 3,5-dimethylpyrazole (DMP), 2,4-dinitro-1-naphthol (DNN) and [(DMPH)<sup>+</sup>(DNN)<sup>-</sup>] CT complex.

| Compound                                             | Frequency                | Assignments              |
|------------------------------------------------------|--------------------------|--------------------------|
| 3,5-dimethylpyrazole                                 | 3282                     | N-H                      |
|                                                      | 3190                     | C-H                      |
|                                                      | 2945                     | CH <sub>3</sub>          |
|                                                      | 1591(str)                | C=C (ring)               |
|                                                      | 1480 (str)               | C-N                      |
|                                                      | 1150                     | N-N                      |
|                                                      | 1019                     | C-H in plane <i>def</i>  |
|                                                      | 781                      | C-H out of plane bending |
| 2,4-dinitro-1-naphthol                               | 3093                     | -OH                      |
|                                                      | 3083-2369                | C-H (Ar)                 |
|                                                      | 1797, 1627, 1583         | C=C (benzene ring)       |
|                                                      | 1353(sy, str), 765(wag)  | Ar-NO <sub>2</sub>       |
| [(DMPH) <sup>+</sup> (DNN) <sup>-</sup> ] CT complex | 3225                     | O--H---N                 |
|                                                      | 3119, 2365               | C-H (Ar)                 |
|                                                      | 3000                     | CH <sub>3</sub>          |
|                                                      | 1601                     | C=C (ring)               |
|                                                      | 1575                     | C=N <sup>+</sup> --H     |
|                                                      | 1531, 1444, 1388         | C=C (benzene ring)       |
|                                                      | 1496                     | C-N                      |
|                                                      | 1349(sy, str), 746(wag)  | Ar-NO <sub>2</sub>       |
|                                                      | 1222                     | N-N                      |
|                                                      | 1087                     | C-H in plane <i>def</i>  |
| 849                                                  | C-H out of plane bending |                          |

Str, stretching; sy, symmetric; wag, wagging; *def*, deforming; Ar, aromatic

**Table 2S**

Gaussian curve analysis for the CT spectrum of DMP with DNN in different solvents.

| <b>Solvent</b> | <b>Area of the curve (<i>A</i>)</b> | <b>Width of the curve (<i>w</i>)</b> | <b>Centre of the curve (<i>x<sub>c</sub></i>)</b> | <b><i>y</i><sub>0</sub></b> |
|----------------|-------------------------------------|--------------------------------------|---------------------------------------------------|-----------------------------|
| Chloroform     | 35.31 ± 2.99                        | 61.55 ± 4.69                         | 279.25 ± 1.96                                     | 0.16 ± 0.01                 |
| DCM            | 19.91 ± 1.88                        | 11.74 ± 1.23                         | 252.46 ± 0.60                                     | 0.53 ± 0.02                 |
| Methanol       | 11.98 ± 1.21                        | 24.06 ± 2.57                         | 266.14 ± 1.22                                     | 0.68 ± 0.01                 |
| Acetonitrile   | 22.37 ± 3.39                        | 68.58 ± 10.22                        | 248.38 ± 4.17                                     | 0.56 ± 0.01                 |
